# Supplementary material for: Nitrogen doped small molecular structures of nano-graphene for high-performance anodes suitable for lithium ion storage
Source: Royal Society of Chemistry journal article supplement (doi:10.1039/c9ra02498k), 2019-01-01
Supplement: c9ra02498k1.pdf [file c9ra02498k1.pdf]

## Supporting information

Nitrogen doped Small Molecular Structure of Nano-graphene Observed Their Dynamic Hierarchical Self-assemble Properties for High Performance Anodes Lithium Ion Storage

Zhixiang Lv,<sup>1</sup> Zhou Wang,<sup>2</sup> Jianhong Chen<sup>1,\*</sup>

<sup>1</sup>Department of Pharmacy, Danyang People's Hospital, Danyang, 212300, P.R. China

<sup>2</sup>College of Vanadium and Titanium, Panzhihua University, Panzhihua, 617000, P.R. China

E-mail address: dyjianhongchen@163.com (J.H. Chen)

### General Information on Techniques

Mass spectra were measured on a Waters Xevo OTof MS with an ASAP probe. Electrospray ionization (ESI) mass spectra were recorded on a Thermoquest Trace. Elemental analyses were performed using a Carlo Erba Instruments CHNS-O EA1108 analyzer.

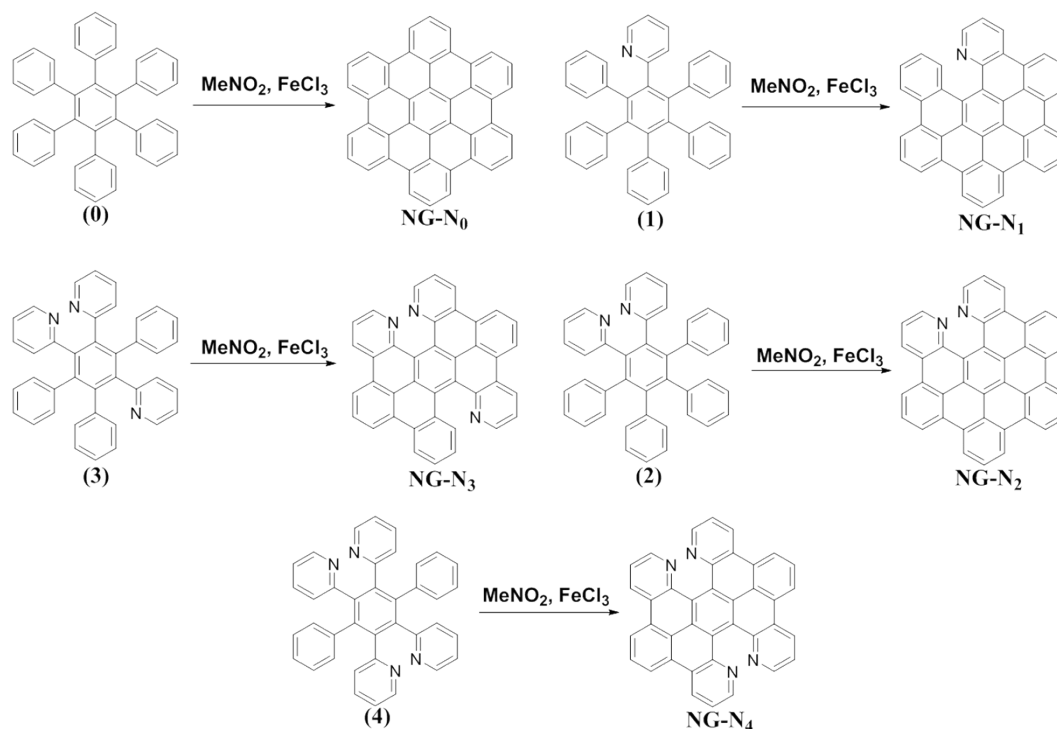

**Scheme-1.** Routes of the N-doped NG-N<sub>0-4</sub> derivatives: design and synthesis.

## 1.1. Materials synthesis

2-(2-Phenylethynyl)pyridine <sup>[1]</sup>, 2,2'-(1,2-ethynediyl)bis-pyridine <sup>[2]</sup> 2,3,4,5-tetraphenyl-2,4-Cyclopentadien-1-one <sup>[3]</sup>, 2,5-diphenyl-3,4-di-2-pyridinyl-2,4-Cyclopentadien-1-one<sup>[4]</sup>, 3',4',5',6'-tetraphenyl-1,1':2',1''-Terphenyl<sup>[5]</sup>, 2-(4',5',6'-triphenyl-[1,1':2',1''-terphenyl]-3'-yl)pyridine<sup>[6]</sup>, 2,2'-(3',6'-diphenyl-[1,1':2',1''-terphenyl]-4',5'-diyl)dipyridine<sup>[7]</sup>, 2,2',2''-(5'-phenyl-[1,1':2',1''-terphenyl]-3',4',6'-triy)tripyrindine<sup>[6]</sup> and 2',3',5',6'-tetra(pyridin-2-yl)-1,1':4',1''-terphenyl were synthesized according to a previously reported procedure<sup>[9,10]</sup>. All other reagents were used as received from commercial sources.

## 1.2. General Procedure for oxidation cyclization reaction

Compound 2',3',5',6'-tetra(pyridin-2-yl)-1,1':4',1''-terphenyl (0.8g, 1.49mmol) was dissolved in dry dichloromethane (40 mL). The solution was degassed via bubbling nitrogen for 10min. Then FeCl<sub>3</sub> (3.37g, 20mmol) in dry nitromethane (7 mL) was added slowly via a syringe. The resulting mixture was kept under nitrogen flow during the entire reaction. After 3 h, the reaction was quenched with a large volume of methanol. The dark precipitate was collected and washed with methanol / acetone / dichloromethane (1:1:1). The final brown precipitate was then collected and dried in a vacuum to afford NG-N<sub>4</sub> Yield: 0.3 g (37%). ESI-MS (M + H)<sup>+</sup>:530.39 for Calculated 530.59; Found, %: C, 86.06; H, 3.45; N, 10.58. C<sub>38</sub>H<sub>18</sub>N<sub>4</sub>. Calculated, %: C, 86.02; H, 3.42; N, 10.56.

Synthesis of NG-N<sub>3</sub>. A procedure analogous to the preparation of NG-N<sub>4</sub> was used and a reddish brown solid. Yield: 0.19 g (32%). ESI-MS (M + H)<sup>+</sup>: 529.60 for Calculated 529.12; Found, %: C, C, 88.47; H, 3.63; N, 7.92. C<sub>39</sub>H<sub>19</sub>N<sub>3</sub>. Calculated, %: C, 88.45; H, 3.62; N, 7.93.

Synthesis of NG-N<sub>2</sub>. A procedure analogous to the preparation of NG-N<sub>4</sub> was used and a yellowish-brown solid. Yield: 0.14 g (28%). ESI-MS (M + H)<sup>+</sup>: 527.02 for Calculated 526.60; Found, %: C, 91.22; H, 3.42; N, 5.37. C<sub>40</sub>H<sub>18</sub>N<sub>2</sub>. Calculated, %: C, 91.23; H, 3.45; N, 5.32.

Synthesis of NG-N<sub>1</sub>. A procedure analogous to the preparation of NG-N<sub>4</sub> was used and a yellowish solid. Yield: 0.15 g (34%). ESI-MS (M + H)<sup>+</sup>: 525.34 for Calculated 525.61; Found, %: C, 93.68; H, 3.66; N, 2.67. C<sub>41</sub>H<sub>19</sub>N. Calculated, %: C, 93.69; H, 3.64; N, 2.66.

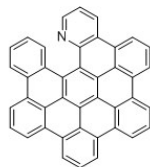

Chemical Formula: C<sub>41</sub>H<sub>19</sub>N  
Molecular Weight: 525.61

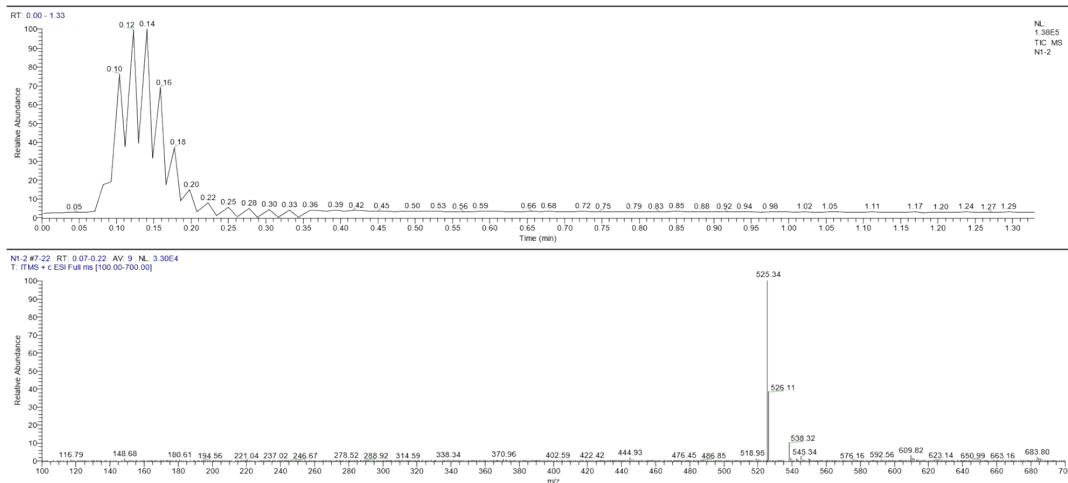

Figure S1. ESI-MS spectrum of NG-N1

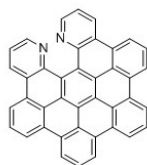

Chemical Formula: C<sub>40</sub>H<sub>18</sub>N<sub>2</sub>  
Molecular Weight: 526.60

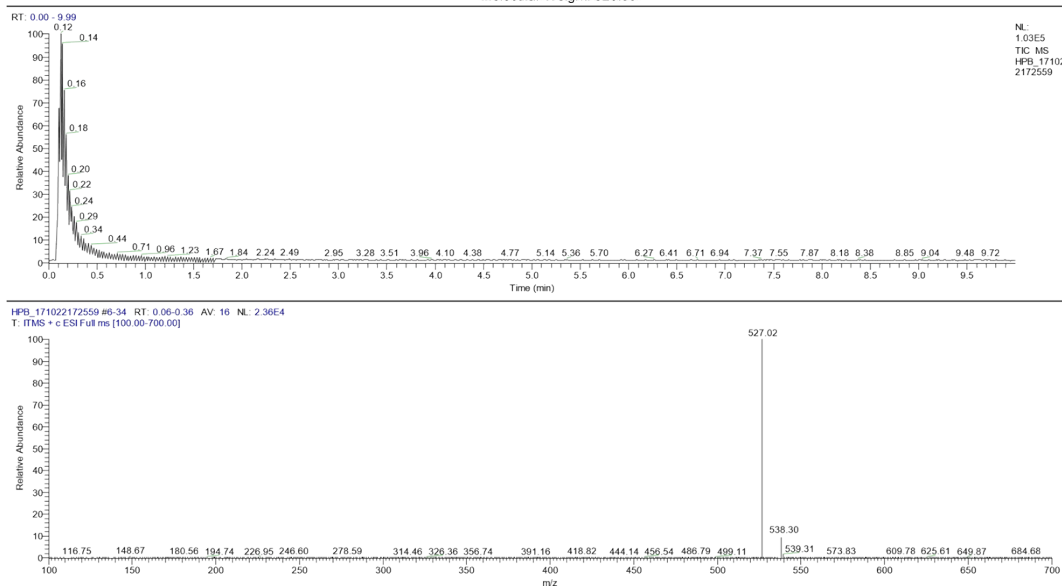

Figure S2. ESI-MS spectrum of NG-N2

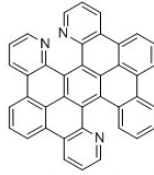

Chemical Formula:  $C_{38}H_{19}N_3$   
Molecular Weight: 529.60

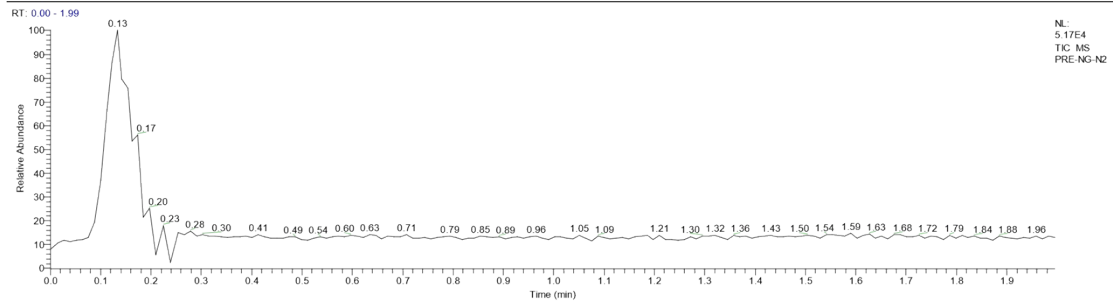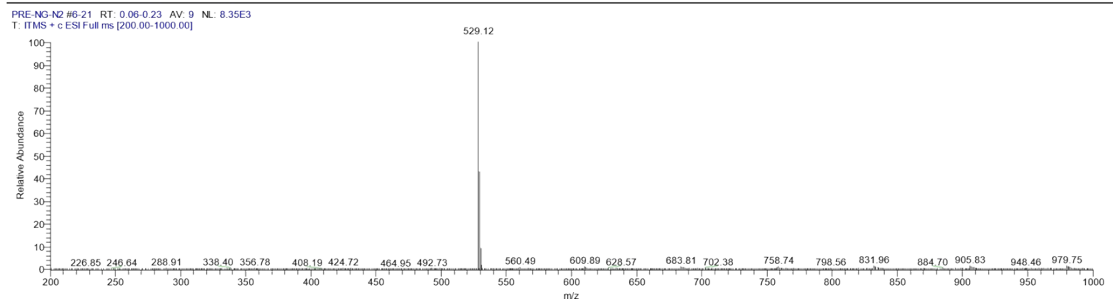

**Figure S3.** ESI-MS spectrum of NG-N3

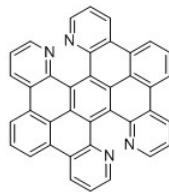

Chemical Formula:  $C_{38}H_{18}N_4$   
Molecular Weight: 530.59

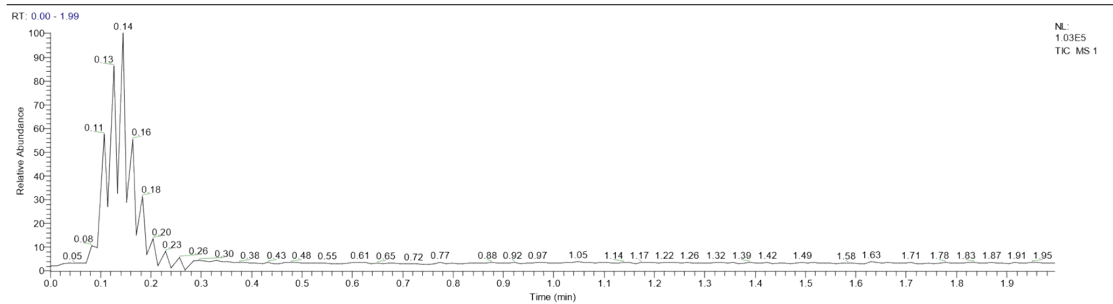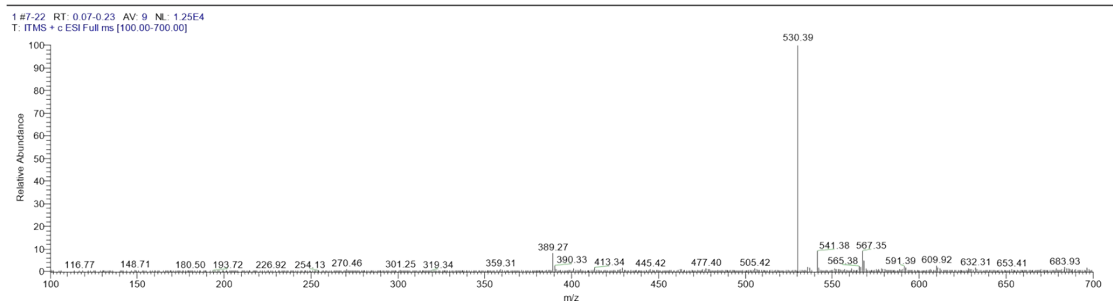

**Figure S4.** ESI-MS spectrum of NG-N4

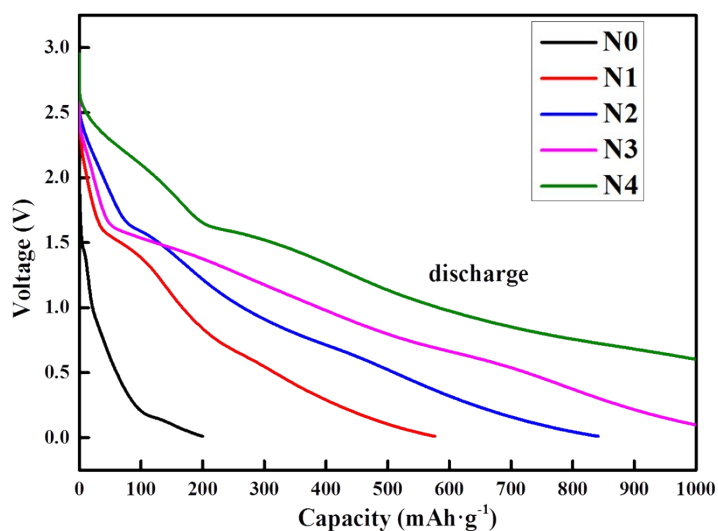

**Figure S5.** The galvanostatic discharge voltage profiles of NG-N<sub>0.4</sub> anode.

#### References

- [1].Walia, P. K; Pramanik, S; Bhalla, V; Kumar, M. *Chem Comm.* 2015. *51*, 17253-17256.
- [2].Qin, H; T, Xu; X, Liu, F. *ChemCatChem* 2017. *9*, 1409 – 1412.
- [3].Wang, X. F; Xu, L. C; Mu, D; Wang, H; Feng, S. Y. *RSC Advances.* 2016. *6*, 23335-23339.
- [4].Li, Z. X; Zhang, L. F; Wang, L. N; Guo, Y. K; Cai, L. H; Yu, M. M; Wei, L. H. *Chem Comm.* 2011.*47*, 5798-5800.
- [5].Makoto, T; Ryouhei, Y; Kohtaro, O. *Chem Comm.* 2012.*48*, 2125-2127.
- [6].Newkome, G. R.; Islam, N. B.; Robinson, J. M. *J. Org. Chem.* 1975.*40*. 3514-3518.
- [7].Sharanjeet, K; Vandana, B; Manoj, K. *ACS Applied Materials & Interfaces.* 2015.*7*, 16617-16624.
- [8].Walia, P.K; Kumar, M; Bhalla, V. *ChemistrySelect.* 2017.*2*, 3758-3768.
- [9].Cao, J; Liu, Y-M; Jing, X. J; Yin, J; Li, J; Xu, B; Tan, Y-Z; Zheng, N. F. *J. A. Chem.Society.* 2015. *137*. 10914-10917
- [10].Liu, R. L; Wu, D. Q; Feng, X. L; Mullen, K. *J. A. Chem.Society.* 2011. *133*. 15221-15223.
